# Supplementary material
Source: Research Square preprint supplement (doi:10.21203/rs.3.rs-8132114/v1)
Supplement: Supplementary file 1 [file 4aa616e356e24aa172222401.docx]

**Supplementary Information**

Text S1 Supplementary Method

We download the source code of package “interactions” version 1.2.0 from the website (<https://cran.r-project.org/web/packages/interactions/index.html>). And we modified the R script “johnson_neyman.R”. Specifically, we inserted Code 1 after original line 192, Code 2 after original line 280, and Code 3 after original line 326.

Code 1:

if(class(mod) == ‘glmmTMB’){

return(lme4::fixef(model)$cond)

}

Code 2:

if(class(model) == ‘glmmTMB’){

vcovs <- vcov(model)$cond

}

Code 3:

if(class(model) == ‘glmmTMB’){

vmat <- vcov(model)$cond

}


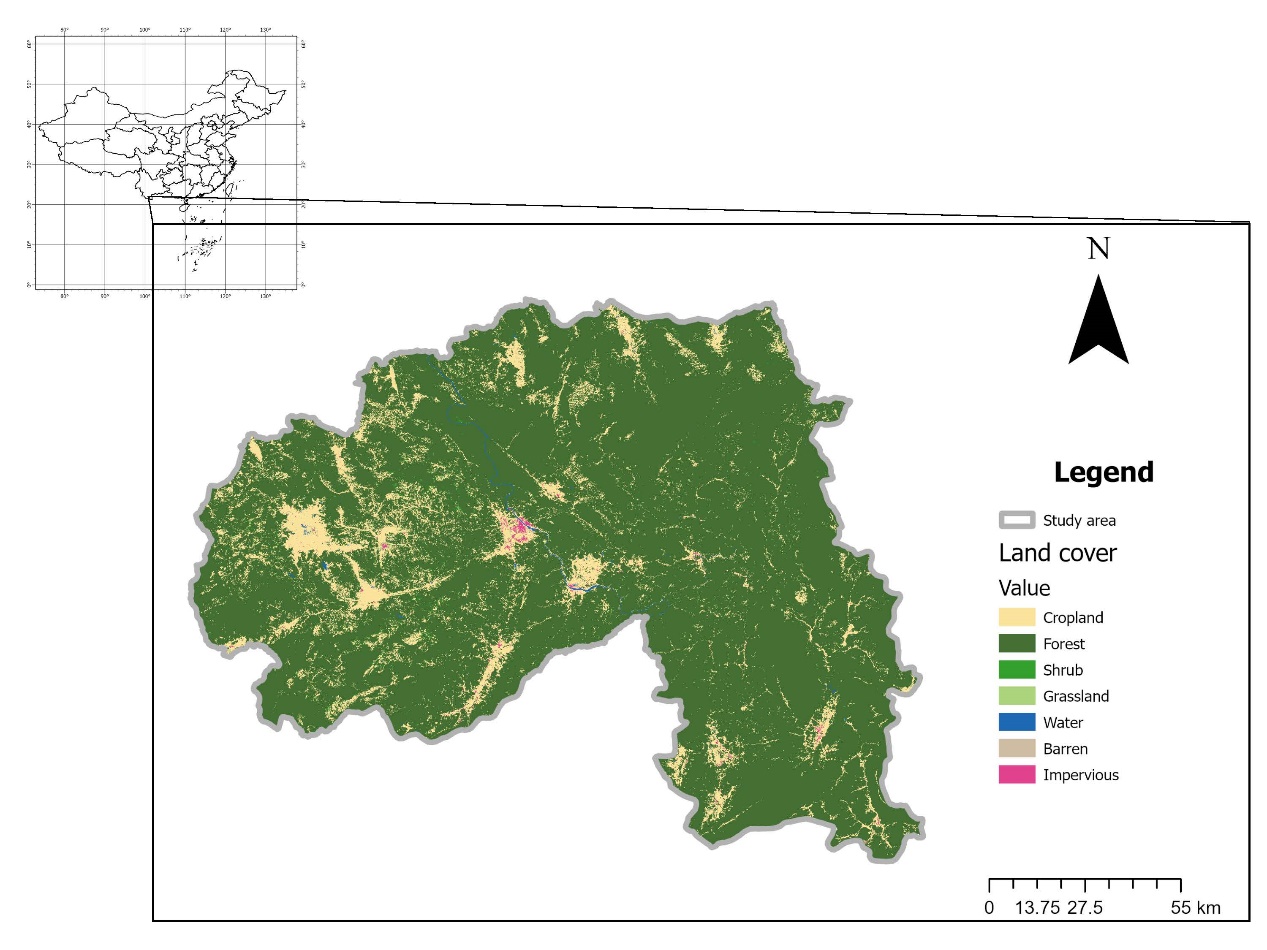


Figure S1. Study area.


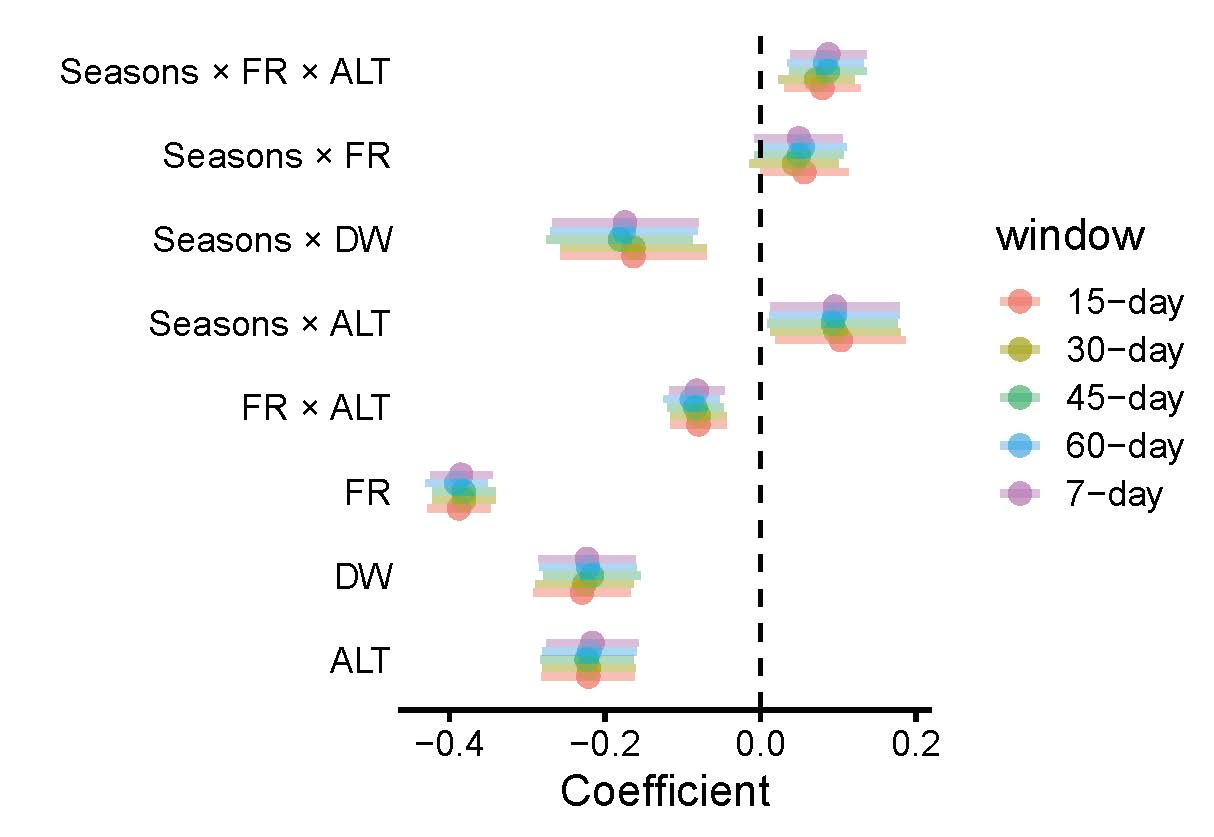


Figure S2. Resource selection function results of different time length windows.


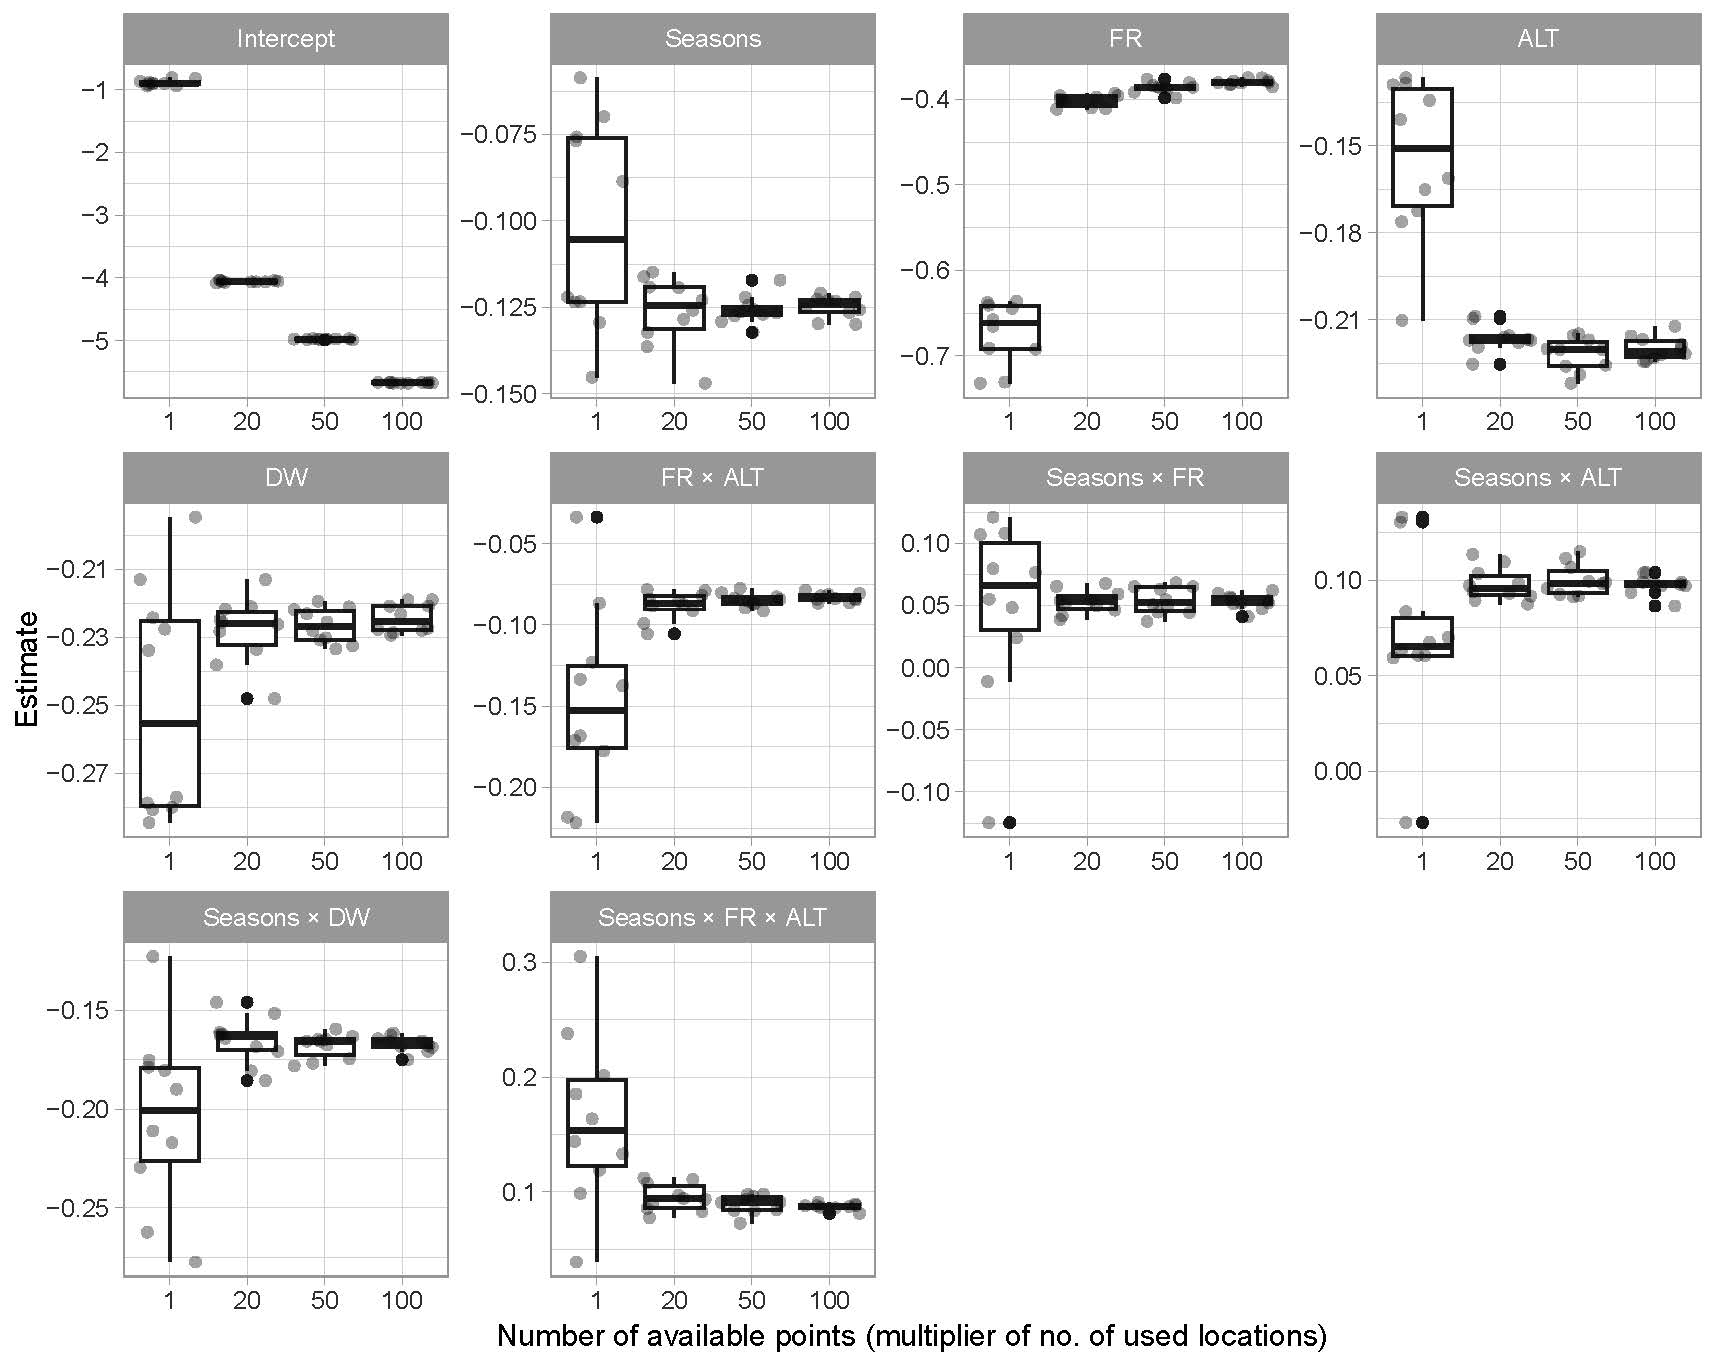


Figure S3. The estimate of resource selection function with different number of available points.

Table S1. Correlation between variables. FR, forest ratio; DW, distance to water; ALT, altitude; TMP, temperature; PRE, precipitation.

|  | FR | ALT | DW | TMP | PRE |
| --- | --- | --- | --- | --- | --- |
| FR | 1 | 0.274233 | 0.23004 | -0.15984 | -0.04022 |
| ALT | 0.274233 | 1 | 0.153783 | -0.2756 | -0.05794 |
| DW | 0.23004 | 0.153783 | 1 | -0.13367 | -0.08301 |
| TMP | -0.15984 | -0.2756 | -0.13367 | 1 | 0.703683 |
| PRE | -0.04022 | -0.05794 | -0.08301 | 0.703683 | 1 |

Table S2. Model 1: Asian elephants’ habitat selection differences between seasons estimated by resource selection function (n = 162792). FR, forest ratio; DW, distance to water; ALT, altitude. Significant terms (P < 0.05) are bolded.

| Variable | Estimate | Std. Error | z value | Pr(>|z|) |
| --- | --- | --- | --- | --- |
| Intercept | -4.2108 | 0.33485 | -12.575 | **<2.00E-16** |
| Wet | -0.1292 | 0.04165 | -3.102 | **0.001921** |
| FR | -0.37765 | 0.02048 | -18.438 | **<2.00E-16** |
| ALT | -0.22164 | 0.03056 | -7.254 | **4.06E-13** |
| DW | -0.23475 | 0.03203 | -7.329 | **2.33E-13** |
| FR : ALT | -0.08288 | 0.01827 | -4.537 | **5.72E-06** |
| Wet : FR | 0.03946 | 0.0291 | 1.356 | 0.175108 |
| Wet : ALT | 0.103 | 0.04262 | 2.417 | **0.015648** |
| Wet : DW | -0.16089 | 0.04829 | -3.332 | **0.000862** |
| Wet : FR : ALT | 0.07326 | 0.02492 | 2.94 | **0.003287** |

Table S3. The variance inflation factor (VIF) of the Model 1.

| Term | VIF | VIF_CI | | Increased SE | Tolerance | Tolerance CI | |
| --- | --- | --- | --- | --- | --- | --- | --- |
| Seasons | 1.33 | 1.32 | 1.33 | 1.15 | 0.75 | 0.75 | 0.76 |
| ALT | 2.81 | 2.79 | 2.83 | 1.68 | 0.36 | 0.35 | 0.36 |
| DW | 2.24 | 2.22 | 2.26 | 1.50 | 0.45 | 0.44 | 0.45 |
| FR : ALT | 3.46 | 3.43 | 3.49 | 1.86 | 0.29 | 0.29 | 0.29 |
| Wet : ALT | 2.95 | 2.93 | 2.97 | 1.72 | 0.34 | 0.34 | 0.34 |
| Wet : DW | 2.65 | 2.63 | 2.67 | 1.63 | 0.38 | 0.37 | 0.38 |
| Wet : FR : ALT | 3.70 | 3.67 | 3.73 | 1.92 | 0.27 | 0.27 | 0.27 |
| FR | 2.90 | 2.87 | 2.92 | 1.70 | 0.35 | 0.34 | 0.35 |
| Wet : FR | 3.31 | 3.28 | 3.34 | 1.82 | 0.30 | 0.30 | 0.30 |

Table S4. Model 2: Habitat differences between seasons estimated by the generalized linear mixed models with binomial family. FR, forest ratio; DW, distance to water; ALT, altitude. Significant terms (P < 0.05) are bolded.

| Variables | Estimate | Std.Error | z value | Pr(>|z|) |
| --- | --- | --- | --- | --- |
| Intercept | 0.15111 | 0.23338 | 0.647 | 0.51732 |
| FR | 0.13461 | 0.04349 | 3.095 | **0.00197** |
| ALT | -0.04637 | 0.04007 | -1.157 | 0.24722 |
| DW | -0.18001 | 0.03799 | -4.739 | **2.15E-06** |
| FR : ALT | 0.16843 | 0.03582 | 4.702 | **2.58E-06** |

Table S5. The variance inflation factor (VIF) of the generalized linear mixed models with binomial family. FR, forest ratio; DW, distance to water; ALT, altitude.

| Term | VIF | VIF CI | | Increased SE | Tolerance | Tolerance CI | |
| --- | --- | --- | --- | --- | --- | --- | --- |
| FR | 1.25 | 1.20 | 1.31 | 1.12 | 0.80 | 0.76 | 0.83 |
| ALT | 1.11 | 1.07 | 1.16 | 1.05 | 0.90 | 0.86 | 0.93 |
| DW | 1.07 | 1.04 | 1.12 | 1.03 | 0.94 | 0.89 | 0.96 |
| FR : ALT | 1.09 | 1.06 | 1.15 | 1.05 | 0.91 | 0.87 | 0.94 |

Table S6. Model 3: The bootstrap coefficient of GLMM on the mixed dataset (n = 6296).

| Variables | mean | 95% CI | |
| --- | --- | --- | --- |
| Intercept | 0.022545 | -0.00941 | 0.053943 |
| FR | -0.02677 | -0.11427 | 0.063813 |
| ALT | 0.006901 | -0.06008 | 0.069767 |
| DW | 0.00769 | -0.0522 | 0.07138 |
| Ocuur | 0.039676 | 0.004126 | 0.078913 |
| FR : ALT | 0.009443 | -0.06012 | 0.079363 |
| FR : ocuur | 0.121823 | 0.030384 | 0.213038 |
| ALT : ocuur | 0.027176 | -0.03859 | 0.094809 |
| DW : ocuur | -0.22411 | -0.28886 | -0.16185 |
| FR : ALT : ocuur | 0.175977 | 0.104986 | 0.245698 |

Table S7. The model rank of ordered beta regressions.

| Intercept | ALT | DW | TMP | ALT : DW | ALT : TMP | DW : TMP | ALT : DW: TMP | df | logLik | AICc | delta | weight |
| --- | --- | --- | --- | --- | --- | --- | --- | --- | --- | --- | --- | --- |
| 0.842031 | 0.219318 | 0.193921 | -0.102775 | NA | 0.102452 | NA | NA | 8 | -58.9961701 | 134.0382147 | 0 | 0.381106521 |
| 0.843532 | 0.218247 | 0.194486 | -0.103072 | NA | 0.097078 | 0.024020 | NA | 9 | -58.29570958 | 134.6487805 | 0.610565853 | 0.280843056 |
| 0.841788 | 0.219528 | 0.194427 | -0.102862 | 0.003163 | 0.103245 | NA | NA | 9 | -58.98671123 | 136.0307838 | 1.992569166 | 0.140723129 |
| 0.842865 | 0.218862 | 0.196298 | -0.103406 | 0.011048 | 0.099340 | 0.026542 | NA | 10 | -58.18860612 | 136.4473429 | 2.40912826 | 0.114264369 |
| 0.843684 | 0.213586 | 0.190606 | -0.099322 | 0.013243 | 0.097932 | 0.023087 | -0.024574 | 11 | -57.50062695 | 137.0854376 | 3.047222891 | 0.083052046 |

FR, forest ratio; DW, distance to water; ALT, altitude; TMP, temperature. The final model was highlighted in red.

| Variables | Estimate | Std.Error | z value | Pr(>|z|) |
| --- | --- | --- | --- | --- |
| Intercept | 0.84203 | 0.02256 | 37.32 | **< 2e-16** |
| DW | 0.19392 | 0.02063 | 9.4 | **< 2e-16** |
| ALT | 0.21932 | 0.02064 | 10.63 | **< 2e-16** |
| TMP | -0.10278 | 0.02003 | -5.13 | **2.87E-07** |
| ALT : TMP | 0.10245 | 0.01939 | 5.28 | **1.26E-07** |

Table S8. Model 4: The final ordered beta regressions.

DW, distance to water; ALT, altitude; TMP, temperature. Significant terms (P < 0.05) are bolded.

Table S9. The variance inflation factor (VIF) of the ordered beta regressions.

| Term | VIF | VIF CI | | Increased SE | Tolerance | Tolerance CI | |
| --- | --- | --- | --- | --- | --- | --- | --- |
| DW | 1.03 | 1.01 | 1.10 | 1.01 | 0.97 | 0.91 | 0.99 |
| ALT | 1.12 | 1.08 | 1.17 | 1.06 | 0.90 | 0.86 | 0.92 |
| TMP | 1.07 | 1.04 | 1.13 | 1.04 | 0.93 | 0.89 | 0.96 |
| ALT : TMP | 1.04 | 1.02 | 1.10 | 1.02 | 0.96 | 0.91 | 0.98 |

DW, distance to water; ALT, altitude; TMP, temperature.
